# Supplementary material for: Nanosecond pulsed electric fields modulate the expression of the astaxanthin biosynthesis genes psy, crtR-b and bkt 1 in Haematococcus pluvialis
Source: PubMed Central journal article supplement (PMC7511312; doi:10.1038/s41598-020-72479-5), 2020-09-23
Supplement: 41598_2020_72479_MOESM1_ESM.pdf [file 41598_2020_72479_MOESM1_ESM.pdf]

**Nanosecond pulsed electric fields modulate the expression of the  
astaxanthin biosynthesis genes *psy*, *crtR-b* and *bkt 1* in *Haematococcus  
pluvialis***

Fan Bai <sup>a</sup>, Christian Gusbeth <sup>b</sup>, Wolfgang Frey <sup>b</sup>, Peter Nick <sup>a\*</sup>

<sup>a</sup> Botanical Institute, Karlsruhe Institute of Technology, Fritz-Haber-Weg 4, 76131 Karlsruhe,  
Germany

<sup>b</sup> Institute for Pulsed Power and Microwave Technology (IHM), Karlsruhe Institute of Technology,  
Campus Nord, 76344 Eggenstein-Leopoldshafen, Germany

\* Corresponding author. Tel.: +49 721 608 42144 / 42142; fax +49 721 608 4193

E-mail addresses: [baifan1215@aliyun.com](mailto:baifan1215@aliyun.com) (F. Bai), [christian.gusbeth@kit.edu](mailto:christian.gusbeth@kit.edu) (C. Gusbeth),  
[wolfgang.frey@kit.edu](mailto:wolfgang.frey@kit.edu) (W. Frey), [peter.nick@kit.edu](mailto:peter.nick@kit.edu) (P. Nick).

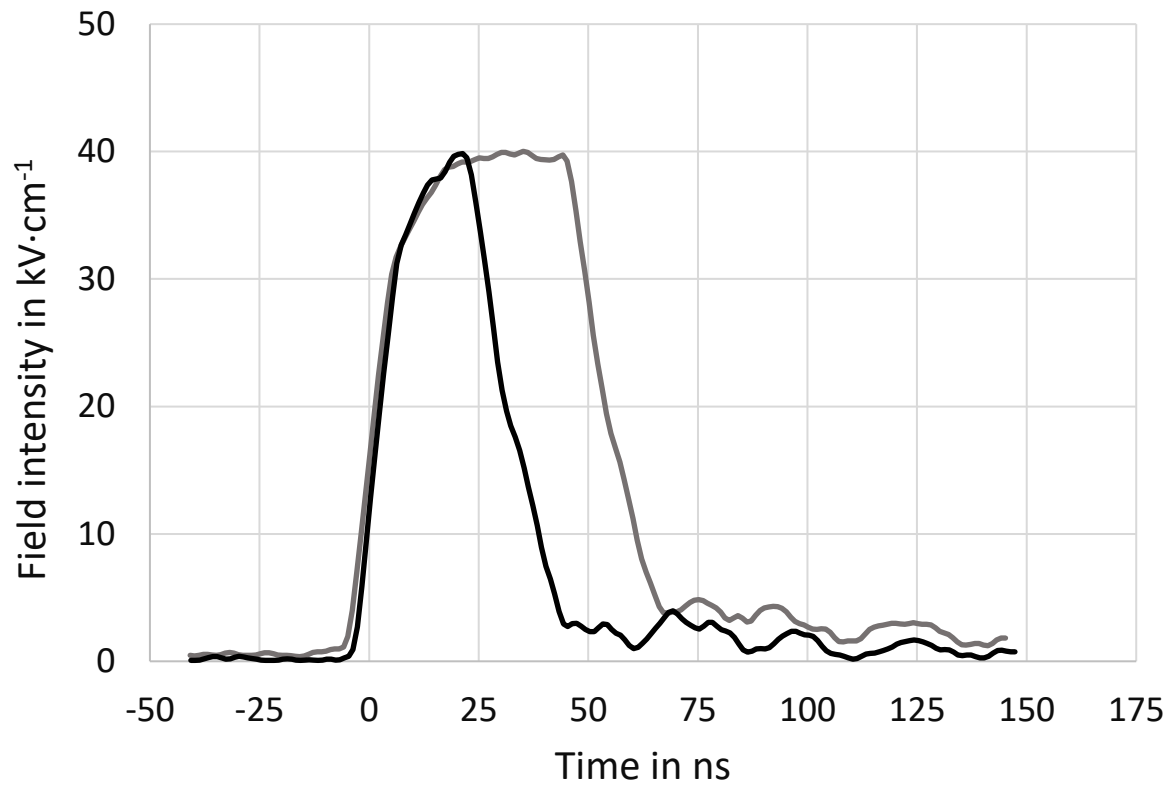

**Supplementary figure S1.** Waveform of the electric field pulse with a pulse duration of 25 ns (black) and 50 ns (grey). The displayed waveform is calculated from the voltage measurement across the electrode divided by the gap distance of 0.2 cm.
